# Supplementary material
Source: PubMed Central journal article supplement (PMC6535957)
Supplement: Supp_Fig1.pdf [file Supp_Fig1.pdf]

## Supplementary Data

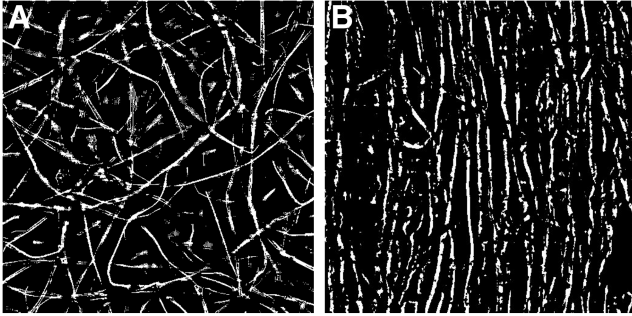

**SUPPLEMENTARY FIG. S1.** Image analysis of dECM scaffolds for porosity calculations. **(A)** Representative images of randomly oriented and **(B)** aligned dECM scaffolds taken via confocal microscopy. A threshold was then applied to isolate fibers (*white*). dECM, decellularized extracellular matrix.
