# Supplementary material
Source: PubMed Central journal article supplement (PMC6535957)
Supplement: Supp_Fig2.pdf [file Supp_Fig2.pdf]

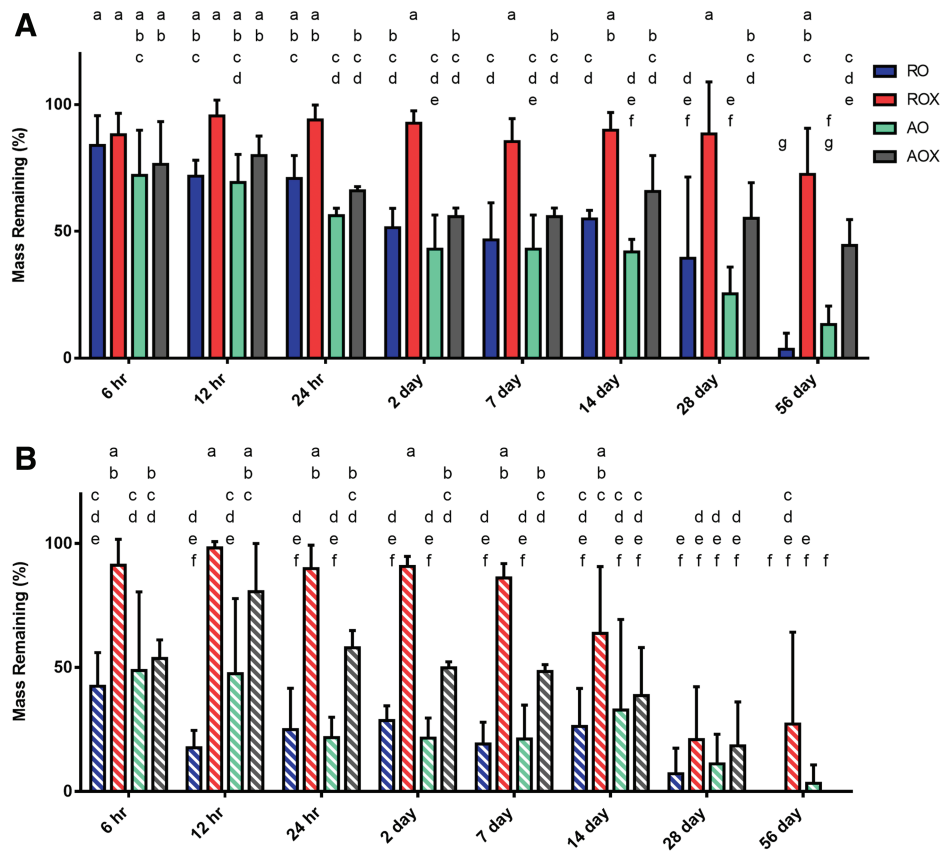

**SUPPLEMENTARY FIG. S2.** Statistical analysis of degradation kinetics of dECM scaffolds. (A) PBS degradation of dECM scaffolds and (B) PBS supplemented with collagenase degradation of dECM scaffolds. Four groups of dECM scaffolds (RO, ROX, AO, and AOX) were tested under mild agitation and incubation at 37°C. Shared letters indicate no significant difference between groups ( $n=5$ ,  $p < 0.05$ ). PBS, phosphate-buffered saline.
