# Supplementary material
Source: PubMed Central journal article supplement (PMC6535957)
Supplement: Supp_Fig3.pdf [file Supp_Fig3.pdf]

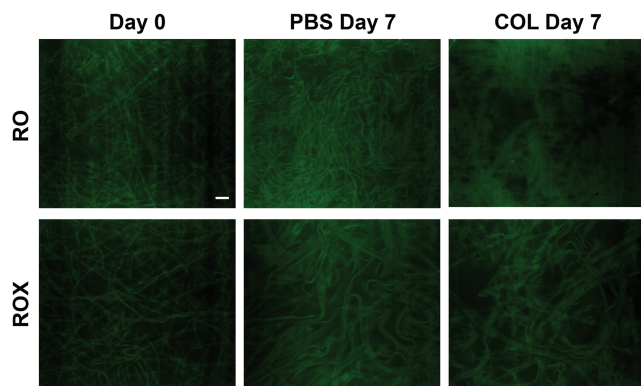

**SUPPLEMENTARY FIG. S3.** Morphological analysis of dECM scaffolds in degradation media. Images were taken of uncrosslinked, randomly oriented scaffolds (RO) and crosslinked, randomly oriented scaffolds (ROX) after swelling in PBS (Day 0), after degrading in PBS (Day 7), and after degrading PBS supplemented with collagenase (Day 7). All images were taken under the same magnification. The scale bar represents 10  $\mu\text{m}$ .
